# Supplementary material
Source: publisher figshare collection journal article supplement (https://acs.figshare.com/ndownloader/files/4493479)
Supplement: Supplementary file 1 [file 4493479]

# Supporting Information

## **Stripping Voltammetric Detection of Mercury (II) Based on a Bimetallic Au-Pt Inorganic–Organic Hybrid Nanocomposite Modified Glassy Carbon Electrode**

*Jingming Gong,\* Ting Zhou, Dandan Song, and Lizhi Zhang\**

Key Laboratory of Pesticide & Chemical Biology of Ministry of Education, College of Chemistry,  
Central China Normal University, Wuhan 430079, P. R. China

E-mail address: [jmgong@mail.ccnu.edu.cn](mailto:jmgong@mail.ccnu.edu.cn). Phone/Fax: +86-27-6786 7535

\* To whom correspondence should be addressed.

### **Experiment Section**

**The preparation of colloidal gold sol-gel:** Citrate-stabilized nanosized gold sol-gel was prepared by adding 0.64 mL of 1.15% trisodium citrate and freshly prepared 0.08% NaBH<sub>4</sub> (0.32 mL) in 1% trisodium citrate to 30 mL of water containing 1% HAuCl<sub>4</sub> (0.32 mL) and stirring the solution for 10 min at room temperature.

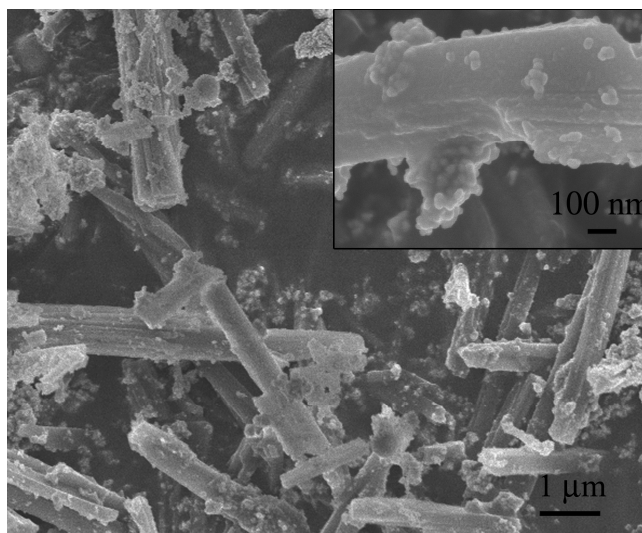

**Figure S-1.** SEM image of AuNPs/NFs modified GC electrode obtained by immersion of NFs/GCE into gold sol-gel solution.

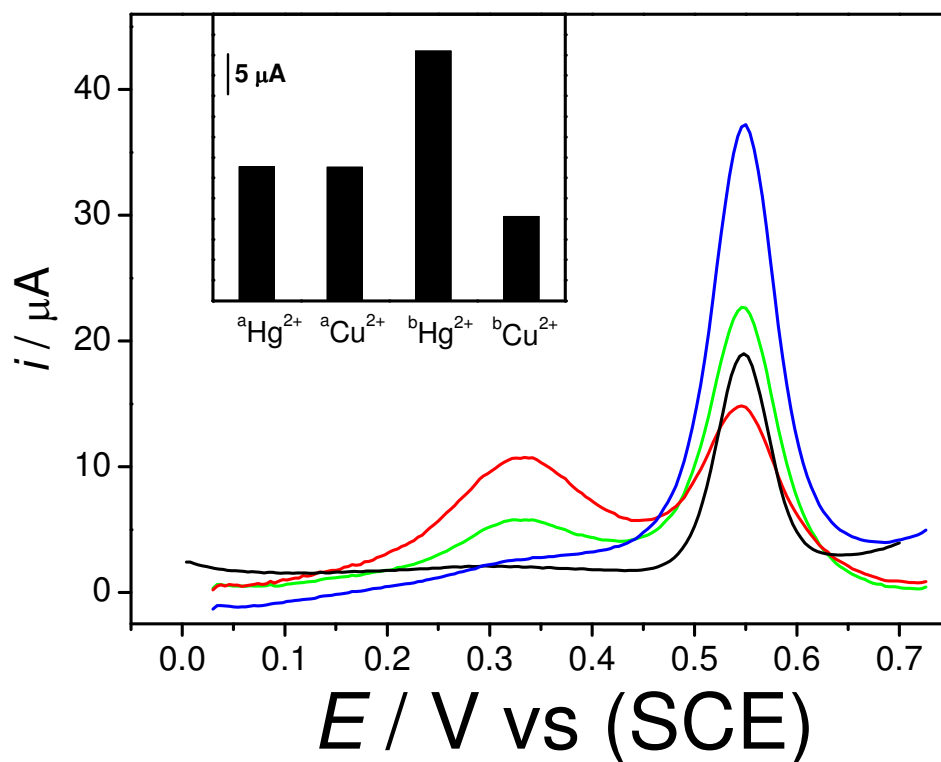

**Figure S-2.** Stripping voltammograms of (black) 2 ppb  $\text{Hg}^{2+}$ , (green) 2 ppb  $\text{Hg}^{2+}$  +20 ppb  $\text{Cu}^{2+}$  (deposition at 0.5 V for 120 S), and (blue) 2ppb  $\text{Hg}^{2+}$ , (red) 2ppb  $\text{Hg}^{2+}$  +20 ppb  $\text{Cu}^{2+}$  (deposition at -0.1 V for 120 S) in 1 M HCl. Inset shows the effects of the application of a deposition potential on the stripping signals of  $\text{Hg}^{2+}$  at Au-PtNPs/NFs/GCE (2 ppb  $\text{Hg}^{2+}$  and 20 ppb for  $\text{Cu}^{2+}$ ). <sup>a</sup> Deposition at 0.5 V for 100 S; <sup>b</sup> Deposition at -0.1 V for 100 S.
